# Supplementary material for: The Individualized Genetic Barrier Predicts Treatment Response in a Large Cohort of HIV-1 Infected Patients
Source: PubMed Central journal article supplement (PMC3757085; doi:10.1371/journal.pcbi.1003203), 2013-08-29
Supplement: pcbi.1003203.s023.pdf [file pcbi.1003203.s023.pdf]

| <b>Group</b>          | <b>Variables</b>                                                                                                                                                                                                                                                                                                                                                                                                                                                                                                                    |
|-----------------------|-------------------------------------------------------------------------------------------------------------------------------------------------------------------------------------------------------------------------------------------------------------------------------------------------------------------------------------------------------------------------------------------------------------------------------------------------------------------------------------------------------------------------------------|
| NRTI                  | ZDV, DDI, DDC, D4T, 3TC, ABC, TDF, FTC                                                                                                                                                                                                                                                                                                                                                                                                                                                                                              |
| NNRTI                 | EFV, NVP                                                                                                                                                                                                                                                                                                                                                                                                                                                                                                                            |
| PI                    | RTV, SQV, SQV/r, IDV, IDV/r, NFV, NFV/r, LPV/r, APV, APV/r, ATV, ATV/r, TPV, TPV/r                                                                                                                                                                                                                                                                                                                                                                                                                                                  |
| Demographic Variables | Age, Gender, Transmission group                                                                                                                                                                                                                                                                                                                                                                                                                                                                                                     |
| Clinical Variables    | AIDS, Maximum viral load, Minimum CD4 T cell count, Adherence to treatment                                                                                                                                                                                                                                                                                                                                                                                                                                                          |
| IGB                   | IGB to ZDV, IGB to DDI, IGB to DDC, IGB to D4T, IGB to 3TC, IGB to ABC, IGB to TDF, IGB to FTC, IGB to EFV, IGB to NVP, IGB to RTV, IGB to SQV, IGB to IDV, IGB to NFV, IGB to LPV, IGB to APV, IGB to ATV, IGB to TPV, IGB to regimen                                                                                                                                                                                                                                                                                              |
| PR                    | 10F, 10I, 10V, 13V, 14R, 15V, 16E, 19I, 20I, 20R, 20T, 30N, 33F, 35D, 36I, 37D, 37H, 41K, 46I, 46L, 54V, 57K, 60E, 62V, 63P, 63S, 63T, 64V, 69K, 70R, 71T, 71V, 72T, 72V, 73S, 74S, 77I, 82A, 84V, 88D, 89M, 90M, 93L                                                                                                                                                                                                                                                                                                               |
| RT                    | 6D, 20R, 35I, 35M, 35T, 36A, 39A, 39E, 40D, 41L, 43E, 44D, 49R, 60I, 62V, 67N, 70R, 74V, 83K, 90I, 98G, 98S, 103N, 108I, 118I, 121H, 122K, 123E, 123N, 123S, 135T, 135V, 142V, 162A, 162C, 165I, 166R, 169D, 173A, 173T, 174K, 177E, 178L, 178M, 179I, 181C, 184V, 190A, 196E, 200A, 200I, 202V, 203K, 207A, 207E, 208Y, 210W, 211K, 211S, 215F, 215Y, 219E, 219Q, 245E, 245Q, 248D, 250E, 281R, 283I, 286A, 291D, 292I, 293V, 294T, 297A, 297K, 297R, 311R, 317A, 322T, 324E, 326V, 329L, 329V, 334L, 335D, 356K, 359S, 371V, 390R |
