# Supplementary material for: The Individualized Genetic Barrier Predicts Treatment Response in a Large Cohort of HIV-1 Infected Patients
Source: PubMed Central journal article supplement (PMC3757085; doi:10.1371/journal.pcbi.1003203), 2013-08-29
Supplement: pcbi.1003203.s024.pdf [file pcbi.1003203.s024.pdf]

| <b>Drug</b> | <b>Class</b> | <b><i>N</i></b> | <b><i>R</i></b> | <b>Selected mutations</b>                                        | <b><i>C</i></b> |
|-------------|--------------|-----------------|-----------------|------------------------------------------------------------------|-----------------|
| ZDV         | NRTI         | 1392            | 0.604           | 41L, 65R, 67N, 69Ins, 70R, 74VI, 151M, 184VI, 210W, 215FY, 219QE | 30.0            |
| DDI         | NRTI         | 1520            | 0.686           | 41L, 65R, 69Ins, 74VI, 151M, 184VI, 210W, 215FY                  | 2.4             |
| DDC         | NRTI         | 1135            | 0.594           | 41L, 65R, 67N, 75M, 75T, 116Y, 151M, 184V, 210W, 211N            | 2.2             |
| D4T         | NRTI         | 1460            | 0.641           | 41L, 65R, 67N, 69Ins, 70R, 151M, 184VI, 210W, 215FY, 219QE       | 2.0             |
| 3TC         | NRTI         | 893             | 0.853           | 41L, 67N, 70R, 181C, 184V, 190A, 210W, 215F, 215Y, 219Q          | 15.4            |
| ABC         | NRTI         | 1348            | 0.652           | 41L, 65R, 69Ins, 74VI, 115F, 151M, 184VI, 210W, 215FY            | 3.4             |
| TDF         | NRTI         | 942             | 0.58            | 41L, 65R, 69Ins, 70R, 74VI, 115F, 151M, 184VI, 210W, 215FY       | 2.1             |
| FTC         | NRTI         | 290             | 0.669           | 65R, 69Ins, 151M, 184VI                                          | 17.0            |
| EFV         | NNRTI        | 1212            | 0.82            | 100I, 101EP, 103NS, 106AM, 181CIV, 188LHC, 190ASE, 230L          | 7.0             |
| NVP         | NNRTI        | 1134            | 0.824           | 100I, 101EP, 103NS, 106AM, 181CIV, 188LHC, 190ASE, 230L          | 9.0             |
| RTV         | PI           | 1821            | 0.812           | 24I, 30N, 32I, 46I, 46L, 54V, 73S, 82A, 84V, 90M                 | 2.6             |
| SQV         | PI           | 2124            | 0.701           | 48VM, 54VTALM, 82AT, 84V, 88S, 90M                               | 4.5             |
| IDV         | PI           | 2170            | 0.785           | 32I, 46IL, 47V, 54VTALM, 76V, 82AFTS, 84V, 88S, 90M              | 4.6             |
| NFV         | PI           | 2135            | 0.782           | 30N, 46IL, 47V, 48VM, 54VTALM, 82AFTS, 84V, 88DS, 90M            | 5.8             |
| LPV         | PI           | 1875            | 0.869           | 32I, 46IL, 47VA, 48VM, 50V, 54VTALM, 76V, 82AFTS, 84V, 90M       | 10.0            |
| APV         | PI           | 1494            | 0.717           | 24I, 32I, 46I, 46L, 48V, 53L, 54V, 82A, 84V, 90M                 | 12.0            |
| ATV         | PI           | 1473            | 0.661           | 10I, 32I, 33F, 46I, 48V, 54V, 71V, 82A, 84V, 90M                 | 4.2             |
| TPV         | PI           | 1458            | 0.584           | 32I, 46IL, 47VA, 54VAM, 82TL, 84V                                | 2.5             |
