# Supplementary material for: The Individualized Genetic Barrier Predicts Treatment Response in a Large Cohort of HIV-1 Infected Patients
Source: PubMed Central journal article supplement (PMC3757085; doi:10.1371/journal.pcbi.1003203), 2013-08-29
Supplement: pcbi.1003203.s026.pdf [file pcbi.1003203.s026.pdf]

| <b>PI (boosted)</b> | <b>50 cps/ml</b> |        | <b>400 cps/ml</b> |        |
|---------------------|------------------|--------|-------------------|--------|
| SQV                 | 205              | (58%)  | 262               | (59%)  |
| IDV                 | 168              | (27%)  | 239               | (26%)  |
| NFV                 | 360              | (0%)   | 464               | (0%)   |
| APV                 | 108              | (41%)  | 130               | (41%)  |
| LPV                 | 467              | (100%) | 545               | (100%) |
| ATV                 | 238              | (82%)  | 250               | (81%)  |
| TPV                 | 21               | (100%) | 22                | (100%) |
| DRV                 | 27               | (96%)  | 27                | (96%)  |
