# Supplementary material for: The Individualized Genetic Barrier Predicts Treatment Response in a Large Cohort of HIV-1 Infected Patients
Source: PubMed Central journal article supplement (PMC3757085; doi:10.1371/journal.pcbi.1003203), 2013-08-29
Supplement: pcbi.1003203.s027.pdf [file pcbi.1003203.s027.pdf]

|                    | AUC   | IGB    | GSS   | IGB+C  | GSS+C | IGB+CDM | GSS+CDM |
|--------------------|-------|--------|-------|--------|-------|---------|---------|
| <b>IGB</b>         | 0.576 |        |       |        |       |         |         |
| <b>GSS</b>         | 0.621 | 0.0058 |       |        |       |         |         |
| <b>IGB+C</b>       | 0.618 | 0.0049 | 0.55  |        |       |         |         |
| <b>GSS+C</b>       | 0.662 | 2e-07  | 0.044 | 0.0012 |       |         |         |
| <b>IGB+CDM</b>     | 0.851 | 7e-35  | 5e-32 | 1e-33  | 1e-30 |         |         |
| <b>GSS+CDM</b>     | 0.858 | 4e-35  | 6e-33 | 4e-34  | 9e-32 | 0.13    |         |
| <b>GSS+IGB+CDM</b> | 0.861 | 4e-35  | 3e-33 | 4e-34  | 3e-32 | 0.021   | 0.34    |
