# Supplementary material for: The Individualized Genetic Barrier Predicts Treatment Response in a Large Cohort of HIV-1 Infected Patients
Source: PubMed Central journal article supplement (PMC3757085; doi:10.1371/journal.pcbi.1003203), 2013-08-29
Supplement: pcbi.1003203.s028.pdf [file pcbi.1003203.s028.pdf]

|                    | AUC   | IGB   | GSS   | IGB+C | GSS+C | IGB+CDM | GSS+CDM |
|--------------------|-------|-------|-------|-------|-------|---------|---------|
| <b>IGB</b>         | 0.648 |       |       |       |       |         |         |
| <b>GSS</b>         | 0.638 | 0.38  |       |       |       |         |         |
| <b>IGB+C</b>       | 0.664 | 0.1   | 0.97  |       |       |         |         |
| <b>GSS+C</b>       | 0.741 | 1e-16 | 1e-07 | 1e-12 |       |         |         |
| <b>IGB+CDM</b>     | 0.829 | 2e-33 | 2e-31 | 1e-33 | 4e-28 |         |         |
| <b>GSS+CDM</b>     | 0.816 | 8e-33 | 1e-29 | 1e-32 | 1e-24 | 0.017   |         |
| <b>GSS+IGB+CDM</b> | 0.835 | 7e-34 | 1e-32 | 6e-34 | 8e-30 | 0.22    | 2e-04   |
